# Supplementary material for: Antibody-free colorimetric detection of chlorothalonil in cucumberviathe inhibition of an enzyme-triggered reaction
Source: Royal Society of Chemistry journal article supplement (doi:10.1039/c9ra00291j), 2019-01-01
Supplement: c9ra00291j1.pdf [file c9ra00291j1.pdf]

## **Electronic Supplementary Information**

### **Antibody-free colorimetric detection of chlorothalonil in cucumber via the inhibition of enzyme-triggered reaction**

Qingju Liu<sup>a,b</sup>, Ping Han<sup>a,b</sup>, Wenwen Gong<sup>a,b</sup>, Hui Wang<sup>a,b</sup>, Xiaoyuan Feng<sup>\*a,b</sup>

a. Beijing Research Center for Agriculture Standards and Testing, Beijing 100097, China;

b. Risk Assessment Lab for Agro-products (Beijing), Ministry of Agriculture, Beijing 100097;

\*Corresponding author:

Tel/Fax: (010) 51503792

E-mail: fengxiaoyuan2014@126.com

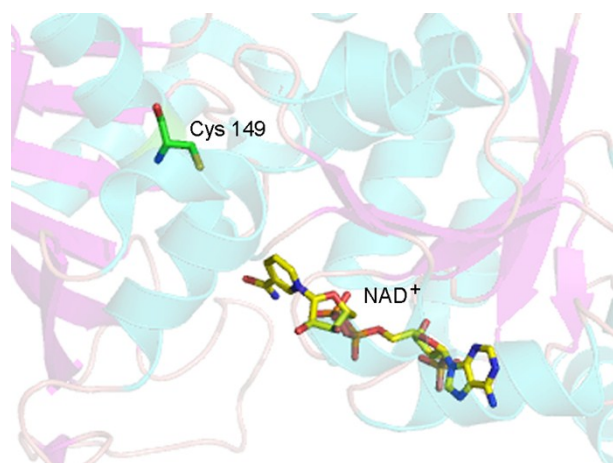

Fig. S1 The Cys 149 and NAD<sup>+</sup> in the GAPDH active site <sup>1</sup>.

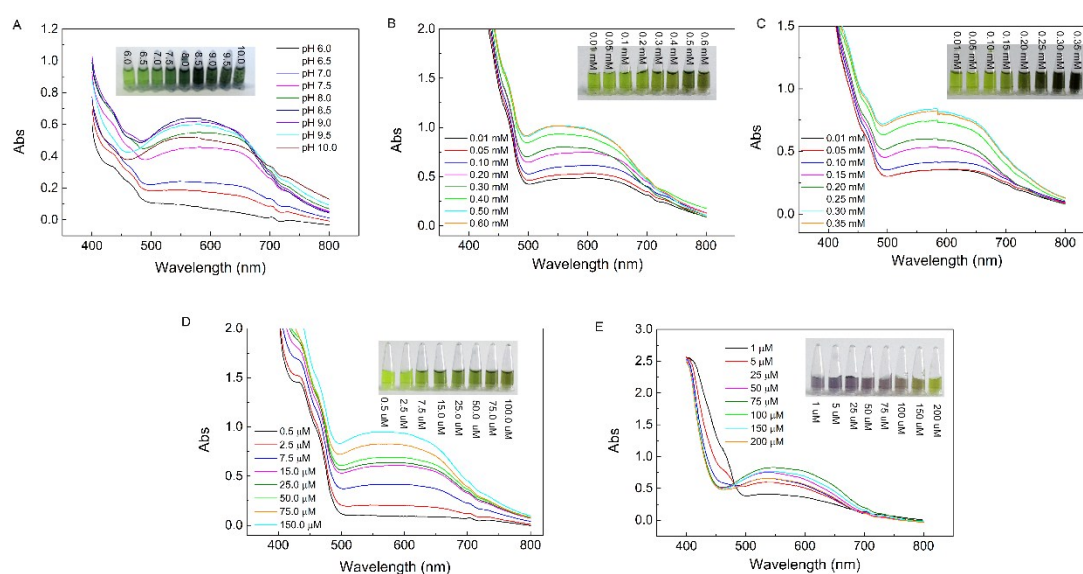

Fig. S2 Optimization of experimental conditions. UV-vis spectra of chromogenic system with different pH values (A), various concentrations substrates (GAP (B),  $\text{NAD}^+$  (C), NBT (D) and PMS (E)), and varied incubation time intervals (E) in the presence of 5  $\mu\text{M}$  CTL. The insert portions were the corresponding photographic images.

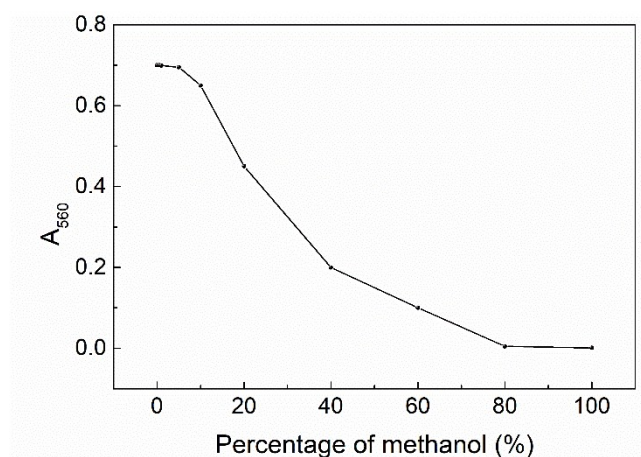

Fig. S3 Effect of different volume of methanol on the enzymatic activity of GAPDH

Table S1 The recovery under different concentration of CTL in cucumber samples by HPLC analysis

| Sample        | Added<br>(ng·mg <sup>-1</sup> ) | HPLC analysis                |                 |         |
|---------------|---------------------------------|------------------------------|-----------------|---------|
|               |                                 | Found (ng·mg <sup>-1</sup> ) | Recovery<br>(%) | RSD (%) |
| Cucumber<br>1 | 50                              | 43.2±1.4                     | 86.4            | 3.2     |
| Cucumber<br>2 | 100                             | 94.1±3.6                     | 94.1            | 3.8     |
| Cucumber<br>3 | 150                             | 130.1±4.3                    | 86.7            | 3.3     |

1. K. A. Chernorizov, J. L. Elkina, P. I. Semenyuk, V. K. Svedas and V. I. Muronetz, *Biochemistry (Mosc)*, 2010, **75**, 1444-1449.
